# Supplementary material for: Antibiofilm activity of flavonoids on staphylococcal biofilms through targeting BAP amyloids
Source: PubMed Central journal article supplement (PMC7641273; doi:10.1038/s41598-020-75929-2), 2020-11-03
Supplement: 41598_2020_75929_MOESM1_ESM.pdf [file 41598_2020_75929_MOESM1_ESM.pdf]

**Supplementary Material**

**Antibiofilm activity of flavonoids on *staphylococcal* biofilms through targeting BAP amyloids.**

Leticia Matilla-Cuenca<sup>1</sup>, Carmen Gil<sup>2</sup>, Sergio Cuesta<sup>1</sup>, Beatriz Rapún-Araiz<sup>2</sup>, Miglė Žiemytė<sup>3</sup>, Alex Mira<sup>3</sup>, Iñigo Lasa<sup>2</sup>, Jaione Valle<sup>1\*</sup>

<sup>1</sup>*Instituto de Agrobiotecnología (IDAB). CSIC-UPNA-Gobierno de Navarra. Avenida Pamplona 123. Mutilva-31192, Spain*

<sup>2</sup>*Navarrabiomed-Universidad Pública de Navarra-Departamento de Salud, IDISNA, Pamplona-31008, Navarra, Spain*

<sup>3</sup>*Genomics and Health Department, FISABIO Foundation, 46020 Valencia, Spain*

\* *Corresponding author: jaione.valle@csic.es*

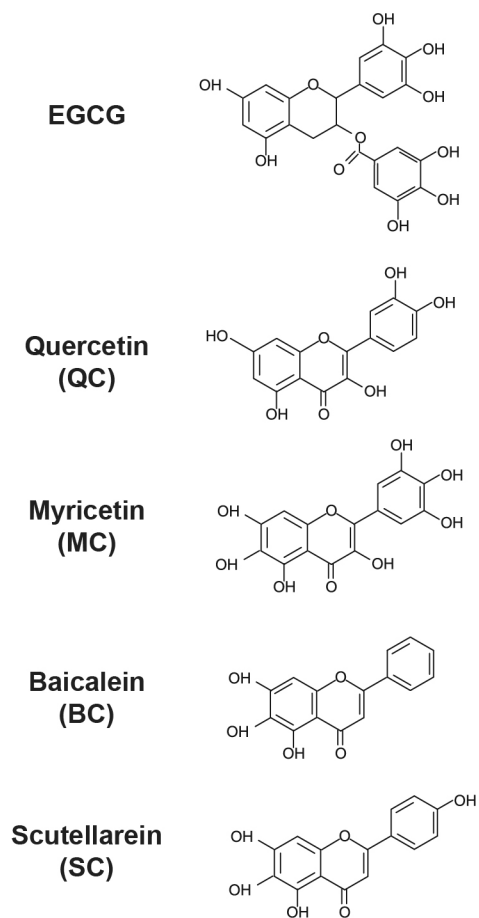

**Figure S1:** Structures of the polyphenolic compounds used in this study

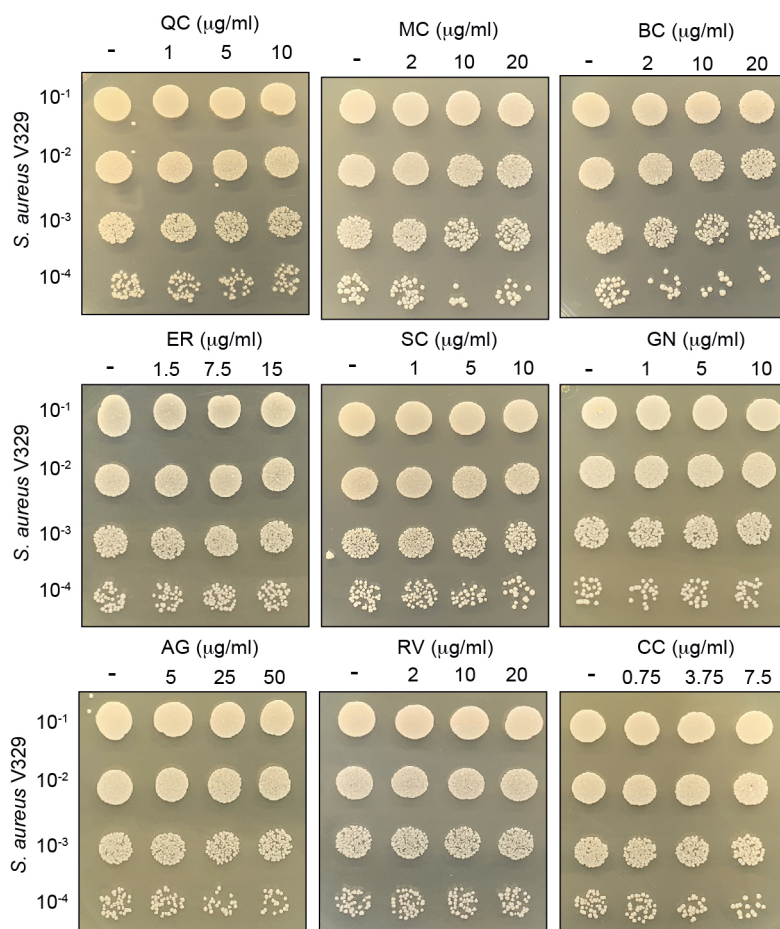

**Figure S2.** Bacterial growth on TSA medium. *S. aureus* was grown overnight in TSB-glu with sub-MICs dosages of the polyphenols. Serial dilutions were spotted on agar plates and were incubated at 37 °C.

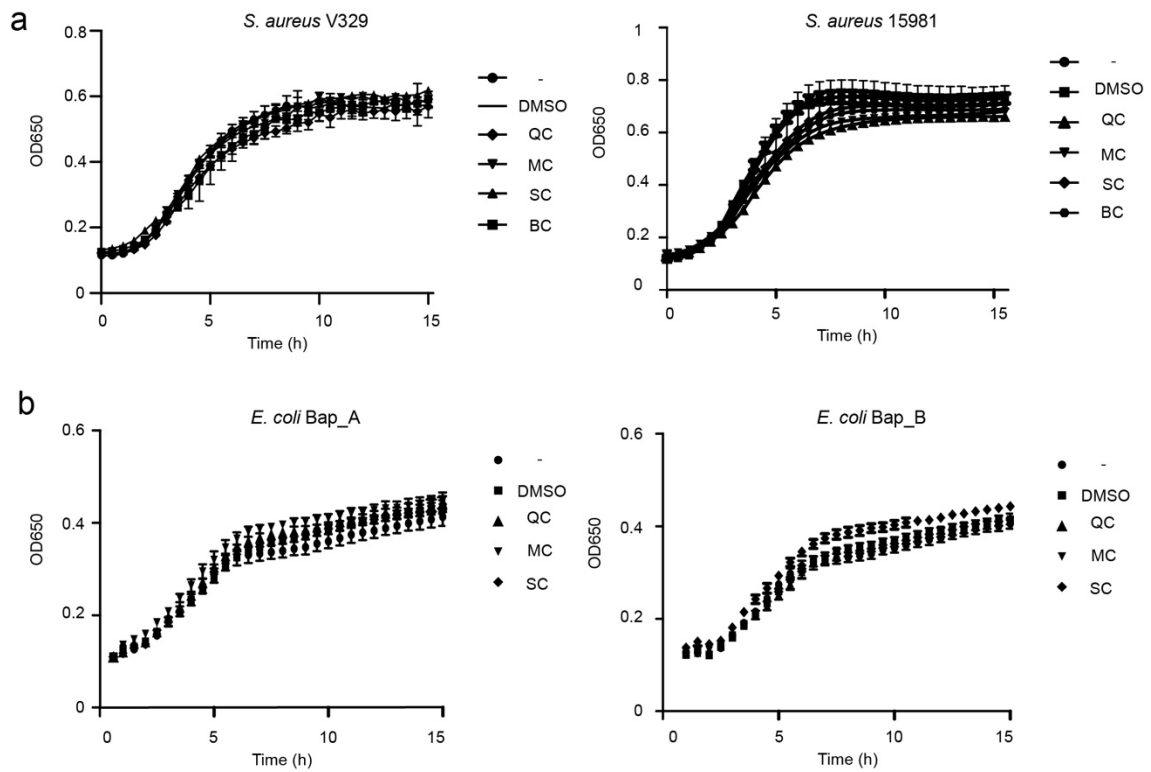

**Figure S3:** a) Growth curves of *S. aureus* V329 and 15981 strains in TSB-glu medium (-), and medium supplemented with DMSO 2% and MBIC of polyphenols. b) Growth curves of *E. coli* VS39 expressing the Bap\_A and Bap\_B in LB medium (-), and medium supplemented with DMSO 2% and MBIC of polyphenols. MBIC were used as 10  $\mu\text{g/ml}$  for quercetin (QC), 10  $\mu\text{g/ml}$  for myricetin (MC) and 5  $\mu\text{g/ml}$  for scutellarein (SC), 10  $\mu\text{g/ml}$  for baicalein (BC). Average and SD of three assays are represented.

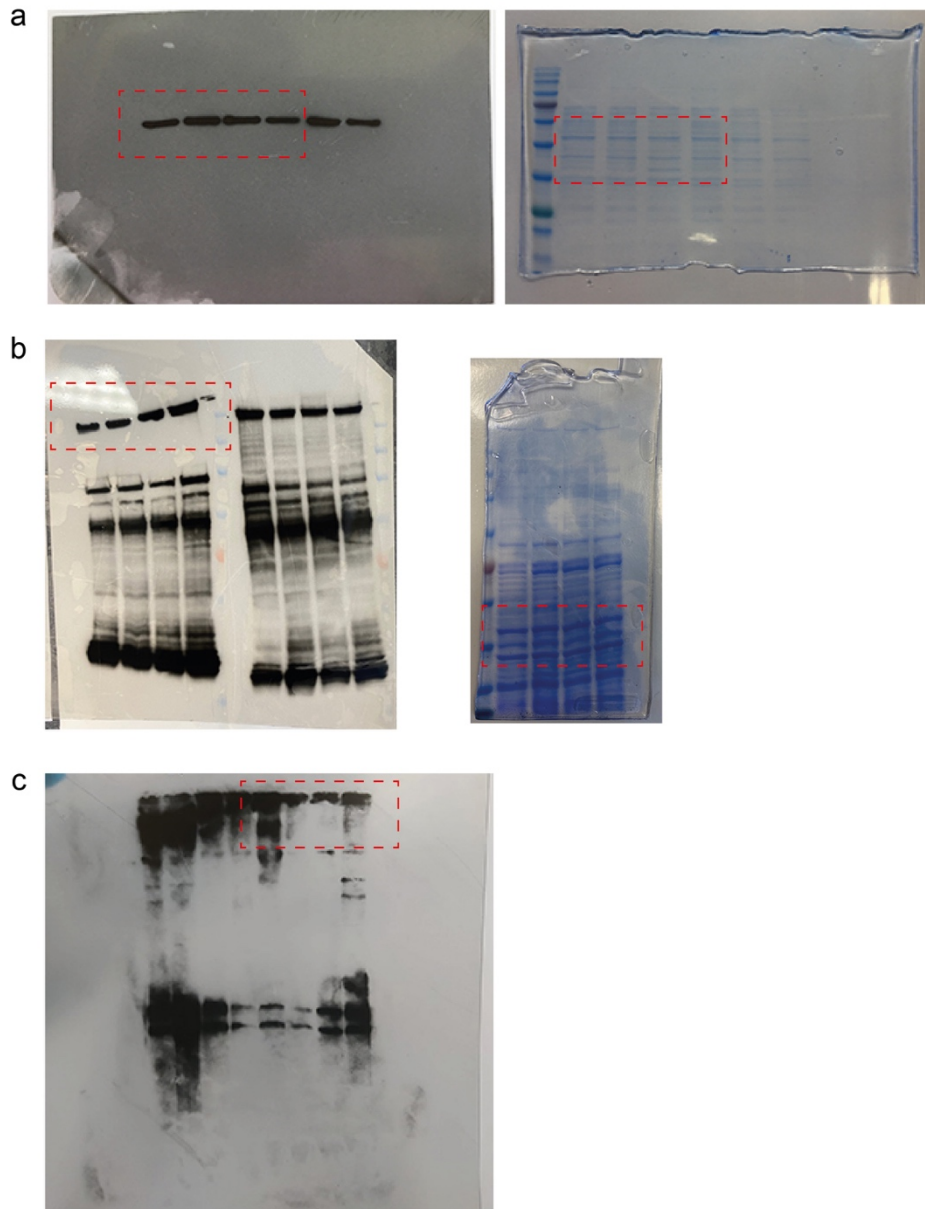

**Figure S4.** Full-length gels and blots shown in figure 3. a) GFP protein levels of *S. aureus* V329 with pCN52-Pbap:GFP plasmid in presence of MBICs of polyphenols. b) Bap protein levels of *S. aureus* V329 in presence of MBICs of polyphenols. c) Native immunoblotting of cell surface extracts *S. aureus* V329 cultured in presence of MBICs of polyphenols. Cropped gels and blots shown in figure 3 are marked with a red box.
